# Melatonin up-regulates the expression of the GATA-4 transcription factor and increases testosterone secretion from Leydig cells through ROR $\alpha$ signaling in an *in vitro* goat spermatogonial stem cell differentiation culture system

Shou-Long Deng<sup>1,\*</sup>, Yan Zhang<sup>1,\*</sup>, Kun Yu<sup>2,\*</sup>, Xiu-Xia Wang<sup>1</sup>, Su-Ren Chen<sup>1</sup>, De-Ping Han<sup>2</sup>, C. Yan Cheng<sup>3</sup>, Zheng-Xing Lian<sup>2</sup> and Yi-Xun Liu<sup>1</sup>

<sup>1</sup>State Key Laboratory of Stem Cell and Reproductive Biology, Institute of Zoology, Chinese Academy of Sciences, Beijing 100101, P.R. China

<sup>2</sup>Laboratory of Animal Genetics and Breeding, College of Animal Science and Technology, China Agricultural University, Beijing 100193, P.R. China

<sup>3</sup>The Mary M. Wohlford Laboratory for Male Contraceptive Research, Center for Biomedical Research, Population Council, New York, NY 10065, USA

\*These authors have contributed equally to this work

Correspondence to: Yi-Xun Liu, email: liuyx@ioz.ac.cn  
Zheng-Xing Lian, email: lianzhx@cau.edu.cn

Keywords: melatonin; ROR $\alpha$ ; steroid hormone; GATA-4; goat

Received: September 26, 2017

Accepted: November 13, 2017

Published: December 01, 2017

Copyright: Deng et al. This is an open-access article distributed under the terms of the Creative Commons Attribution License 3.0 (CC BY 3.0), which permits unrestricted use, distribution, and reproduction in any medium, provided the original author and source are credited.

## ABSTRACT

Because androgen function is regulated by its receptors, androgen-androgen receptor signaling is crucial for regulating spermatogenesis. Androgen is mainly testosterone secreted by testis. Based on the results of early studies in goats, the administration of melatonin over an extended period of time increases steroid production, but the underlying mechanism remains unclear. Here, we report the expression of the melatonin membrane receptors MT1 and MT2 and the retinoic acid receptor-related orphan receptor-alpha (ROR $\alpha$ ) in the goat testis. An *in vitro* differentiation system using spermatogonial stem cells (SSCs) cultured in the presence of testicular somatic cells was able to support the formation of sperm-like cells with a single flagellum. The addition of  $10^{-7}$  M melatonin to the *in vitro* culture system increased ROR $\alpha$  expression and considerably improved the efficiency of haploid cell differentiation, and the addition of the ROR $\alpha$  agonist CGP52608 significantly increased the testosterone concentration and expression of GATA binding factor 4 (GATA-4). Furthermore, inhibitors of melatonin membrane receptors and a ROR $\alpha$  antagonist (T0901317) also led to a considerable reduction in the efficiency of haploid spermatid formation, which was coupled with the suppression of GATA-4 expression. Based on these results, ROR $\alpha$  may play a crucial role in enhancing melatonin-regulated GATA-4 transcription and steroid hormone synthesis in the goat spermatogonial stem cell differentiation culture system.

## INTRODUCTION

Based on earlier findings from our laboratory, melatonin promotes the differentiation of spermatogonia into functional haploid cells in the testes of the Suffolk

ram [1]. Our present report extends these findings to the Saanen goat, another short-day breeder. We used an *in vitro* cell culture system that mimics the testes *in vivo* to determine whether retinoic acid receptor-related orphan receptor-alpha (ROR $\alpha$ /NR1F1) signaling is also involved

in melatonin-promoted goat haploid spermatid production. The interaction of spermatogonial stem cells (SSCs) with the somatic testicular Leydig cells, Sertoli cells and peritubular myoid cells *in vitro* may be particularly important for SSC proliferation and differentiation [2-4]. Mice with a targeted disruption of GATA binding factor 4 (GATA-4) in Sertoli cells display a loss of the establishment and maintenance of the spermatogonial progenitor pool, suggesting that the function of the testicular somatic cells is damaged. Transplantation of germ cells from the testes of early *GATA-4* conditional knockout (cKO) mice or from *in vitro* differentiated SSCs cells to *Kit<sup>W/W-v</sup>* recipient seminiferous tubules restores spermatogenesis and offspring are obtained [5-7]. *In vitro* culture systems, including the use of organ cultures, seminiferous tubule fragment cultures, and mixed cell co-cultures, have recently been shown to support germ cell differentiation [8-10]. Haploid spermatids with tails have been obtained from these cultures and used to produce normal offspring after round spermatid injection (ROSI), but the differentiation rate was very low [5, 11, 12]. The cell co-culture model provides a similar microenvironment that is analogous to spermatogenesis *in vivo*, which also extends the survival of spermatogenic cells *in vitro* and improves the sperm differentiation rate [13, 14].

Based on increasing evidence, meiosis and sperm maturation are regulated by various hormones, most notably gonadotropin-releasing hormone (LHRH) secreted from the hypothalamus, to influence pituitary gland luteinizing hormone (LH) and follicle stimulating hormone (FSH) release, which regulates testis function [15-18]. As shown in the study by Viguie et al in ewes, *in vivo* administration of melatonin delays the increase in LHRH and LH secretion [19]. According to another *in vivo* study, melatonin administration also increases plasminogen activator activity in ram spermatozoa [20], suggesting that melatonin, a major secretory product of the pineal gland, possesses both lipophilic and hydrophilic properties that allow it to pass through the blood-testis barrier and enter the adluminal compartment [21] where it plays an important role in gametogenesis through a variety of pathways [22, 23]. G protein-coupled receptors are a major signal transduction pathway for melatonin. As a neuroendocrine hormone, melatonin regulates the transcription of animal reproduction genes by binding nuclear receptors [24, 25]. Antioxidant response signaling is another pathway by which melatonin regulates reproductive function [26]. After binding to a membrane-bound receptor, melatonin regulates testosterone synthesis by activating Gi (inhibitory G protein) and its downstream proteins, such as adenylate cyclase (AC) [27]. Through the membrane-associated pathway, melatonin alters gonad and steroid hormone secretion [28]. Melatonin regulates related genes via the ROR $\alpha$  pathway [29-31]; for example, melatonin participates in regulating aromatase transcription to promote the conversion of androgen

into estrogen [32]. Thus, melatonin may be involved in regulating the intratesticular estrogen level to support spermatogenesis.

In seasonally breeding mammals, melatonin modulates reproductive functions in response to changes in daylight by regulating different levels of the hypothalamic-pituitary-gonadal axis [33]. The melatonin receptor is expressed in testicular cells [34]. By binding to its receptors, melatonin directly influences androgen production by Leydig cells [35], which in turn affects testis development in mice [36]. ROR $\alpha$  is a transcriptional regulator of steroid hormone receptor superfamily genes. Through its target genes, ROR $\alpha$  exerts important effects on differentiation and development [37]. In the present study, we provide further evidence that ROR $\alpha$  increases melatonin-regulated steroid hormone synthesis and SSC differentiation in an *in vitro* Saanen goat SSC/testis somatic cell culture. The pathway by which melatonin regulates steroidogenesis has also been studied. These findings thus provide insights into the treatment of diseases caused by androgen deficiency.

## RESULTS

### ROR $\alpha$ expression is up-regulated during development in goat testes

In histological sections of the testes, only spermatogonia were detected within the seminiferous tubules of 3-month-old goats (Figure 1A). Immunocytochemically, we detected the melatonin receptors MT1, MT2 and ROR $\alpha$  in the samples of 3-month-old goat testes. Positive staining resulted in a yellowish or dark brown color. MT1 and MT2 were localized mainly inside the primordial germ cells and were also detected in the Leydig cells (Figure 1B and 1C). ROR $\alpha$  was restricted to the perinuclear region of the Leydig cells and was detected at lower levels in Sertoli cells and primordial germ cells (Figure 1D). According to the real-time PCR analysis, both MT1 and MT2 were expressed in the goat testes, and their expression decreased as a function of increasing age. In contrast, ROR $\alpha$  mRNA expression increased with aging (Figure 1E). Meanwhile, the MT1, MT2 and ROR $\alpha$  contents detected in the western blots were correlated positively with their mRNA levels (Figure 1F).

### Melatonin promotes haploid spermatozoa formation *in vitro*

The digested mixed testicular cells were seeded into Petri dishes (Figure 2A). During the early stages of incubation, the somatic cells (Sertoli and Leydig cells) grew in adherent cultures. The goat SSCs were differentiated into developmentally competent sperm-like cells by day 15 of culture (Figure 2B). The late round spermatids (Sa2) or early elongating spermatids

(Sb) with a single flagellum and a diameter less than 10  $\mu\text{m}$  were detected, as previously reported [38]. We determined the DNA content of the cells by flow cytometry to investigate whether SSCs differentiate *in vitro*. As shown in Figure 2C, the DNA content of suspended cells showed three peaks, including haploid (1C), prominent diploid, and tetraploid peaks. The haploid efficiency of SSCs treated with additional melatonin was  $13.67 \pm 2.31\%$  which was significantly higher than the control group ( $P < 0.05$ ) (Table 1). Groups treated with additional melatonin expressed higher levels of the SSC differentiation-related genes *Stra8* and *Dmc1* (Figure 2D).

Spermatids expressed the mature sperm protein acrosin (Figure 2E). The expression of the post-meiotic genes *Tnp1* and *Prm1* was up-regulated by melatonin in the differentiated haploid cells compared with that in the control cells (Figure 2F). Single-tailed spermatids were injected into goat metaphase II-stage oocytes and the reconstructed embryos were capable of developing into a blastocyst (Figure 2G). Thus, the *in vitro* cultured spermatids with a single tail had the potential for further development *in vitro*.

The expression of MT mRNAs and protein decreased in the culture system, but MT expression in the melatonin-treated cells was significantly higher than the expression in the control group ( $P < 0.05$ ). The expression of the *ROR $\alpha$*  mRNA and protein was significantly increased in melatonin-treated cells compared with that in the control group ( $P < 0.05$ ) (Figure 2H), suggesting that melatonin promoted goat SSC differentiation in the *in vitro* testis cell culture system.

### Melatonin promotes testosterone secretion through the *ROR $\alpha$* pathway

Melatonin, luzindole, 4-P-PDOT, and T0901317 were added to the culture system, either alone or in combination. The efficiency of the formation of haploid cells was determined by flow cytometry (Figure 3A). Melatonin receptors were involved in SSC differentiation. The formation of haploid cells was dramatically lower by T0901317 compared with that in the control ( $P < 0.05$ ). The levels of the MT1 and MT2 mRNAs were markedly lower in the melatonin+luzindole group ( $P < 0.05$ ). MT2

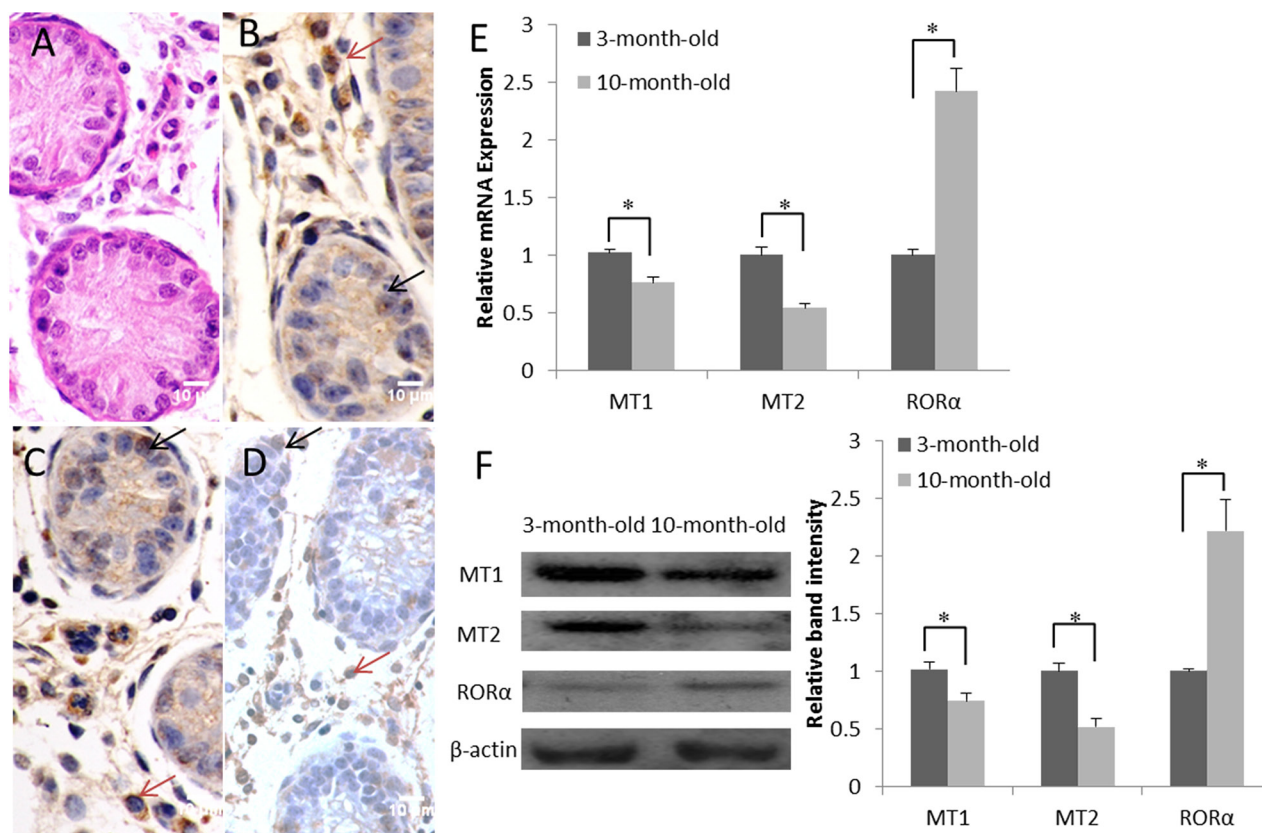

**Figure 1: Expression and localization of the melatonin membrane receptors (MT1 and MT2) and nuclear receptor (ROR $\alpha$ ) in the goat testis.** (A) H&E staining of the 3-month-old goat testis. (B-D) Immunohistochemical study of MT1, MT2 and ROR $\alpha$  expression in the 3-month-old goat testis; primordial germ cells are indicated by black arrows and Leydig cells are indicated by red arrows. (E) Real-time PCR analysis of MT1, MT2 and ROR $\alpha$  mRNA levels in the testes at various ages (3 months old and 10 months old). (F) Expression of the MT1, MT2, and ROR $\alpha$  proteins in the testes at various ages (3 months old and 10 months old) was detected by western blotting. Data are expressed as means  $\pm$  SEM; \*  $P < 0.05$ .



**Table 1: Ratio of haploid spermatozoa in suspending cells in 15 days after SSC differentiation**

| Differentiation medium | Haploid ratio (%)         |
|------------------------|---------------------------|
| Control                | 5.71 ± 1.36 <sup>b</sup>  |
| Melatonin              | 13.67 ± 2.31 <sup>a</sup> |

<sup>a, b</sup> Difference between Melatonin and Control ( $P < 0.05$ ).

expression was lower in the melatonin+4-P-PDOT group (Figure 3B and 3C). MT1 and MT2 expression were not affected in the melatonin+T0901317 group, but ROR $\alpha$  expression was lower ( $P < 0.05$ ) (Figure 3D). There was

no statistical difference between antagonist group and melatonin+antagonist group (Supplementary Figure 1). The cAMP level was higher in cells treated with additional melatonin than in the untreated cells, which might be due to the long-term melatonin treatment, resulting in enhanced cell sensitivity. Among these six groups, the highest cAMP levels were observed in the luzindole-treated group. No statistically significant difference in cAMP levels was observed between the melatonin+T0901317-treated cells and cells treated with only additional melatonin (Figure 3E). Testosterone secretion was only induced in the groups treated with the melatonin+MT1 inhibitor group ( $P < 0.05$ ). In contrast, steroid production was lower in the T0901317-treated cultures ( $P < 0.05$ ) (Figure 3F).

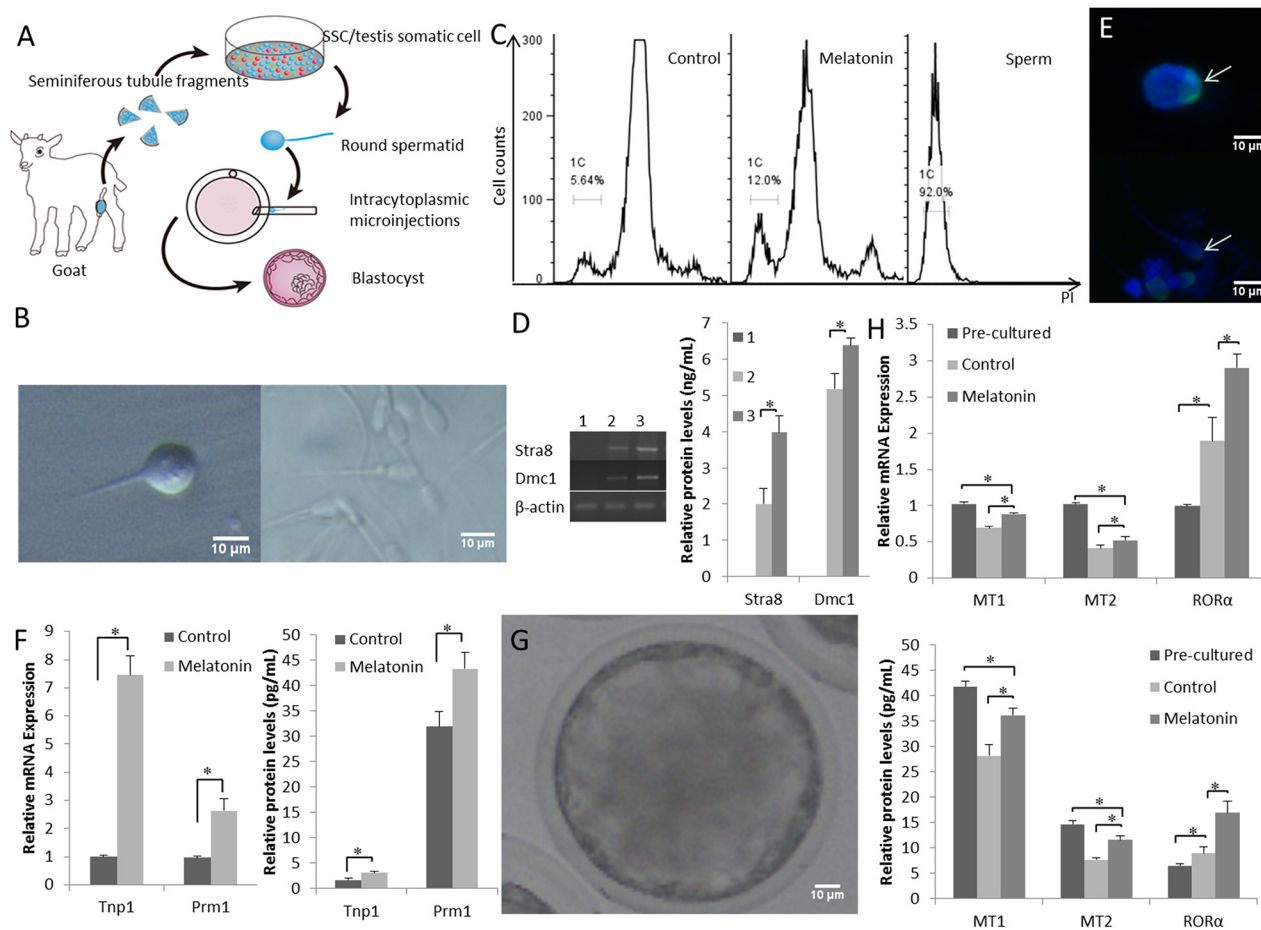

**Figure 2: Functional goat haploid spermatozoa were obtained from the *in vitro* testis cell culture.** (A) A schematic illustration of the culture system used in the present study. (B) Representative micrographs of a spermatid with a single flagellum isolated from the *in vitro* culture (left) and adult goat sperm used as a control (right). (C) DNA contents of the suspended cultured cells were examined by flow cytometry. “Control” is the group that was induced to differentiate with basic medium. “Melatonin” represents cells cultured in basic medium supplemented with melatonin. Adult sperm cells were used as a positive control. 1C marks the haploid peaks. (D) The expression of Stra8 and Dmc1 was assessed in suspension cells. 1: cells from the original passage; 2: cells passaged after differentiation; 3: after induction with 10<sup>-7</sup> M melatonin, suspension cells were passaged after differentiation. (E) Haploid cells expressed the mature sperm protein acrosin (green); nuclei of the cells were stained with DAPI (upper panel), and adult goat sperm were used as a control (lower panel). (F) Expression patterns of post-meiotic genes (Tnp1 and Prm1). (G) Reconstructed embryos developed to the blastocyst stage. (H) The expression of the MT1, MT2, and ROR $\alpha$  was detected pre-culture and post-culture; differentiated cells and cells cultured without melatonin were used as controls. Data are expressed as means ± SEM. \*  $P < 0.05$ .

## Melatonin up-regulates steroidogenesis-related genes via ROR $\alpha$

Melatonin membrane receptor (MT1 and MT2) antagonists and antagonist of the melatonin nuclear receptor (ROR $\alpha$ ) were added to the culture media separately. SF1, StAR, and GATA-4 expression in the cultured cells were measured using real-time PCR. Melatonin up-regulated the expression of steroidogenesis-related genes. In contrast, the SF1 and StAR levels were remarkably lower in the T0901317-treated cells ( $P < 0.05$ ) (Figure 4A and 4B). A similar effect of melatonin on GATA-4 mRNA expression was also observed in the testis cell cultures (Figure 4C), suggesting that melatonin up-regulates the expression of steroidogenesis-related genes in the *in vitro* culture via ROR $\alpha$ .

## Melatonin promotes GATA-4 expression via altering the ROR $\alpha$ signals

Cells in the co-culture system that were treated with the ROR $\alpha$ -specific agonist CGP52608 exhibited increases

in both the efficiency of the formation of haploid cells and testosterone production compared with those in the control ( $P < 0.05$ ) (Figure 5A and 5B). The highest GATA-4 expression was observed in the CGP52608-treated group compared to the melatonin-treated and control groups ( $P < 0.05$ ) (Figure 5C and 5D). Similar results were obtained in the western blots for the GATA-4 protein levels. Increased ROR $\alpha$  expression correlated with the increase in GATA-4 production (Figure 5E). In contrast, interference with ROR $\alpha$  expression using two siRNAs significantly decreased the expression of the GATA-4 mRNA ( $P < 0.05$ ) (Figure 5F). In addition, the level of testosterone was decreased in cells transfected with the GATA-4 siRNA ( $P < 0.05$ ) (Supplementary Figure 2). Immunohistochemistry was used to visualize GATA-4 localization in the 3-month- and 10-month-old goat testes. GATA-4 staining was detected in the Leydig cells, Sertoli cells, and primordial germ cells, and increased as a function of goat age (Figure 5G). Based on these results, melatonin promotes steroid synthesis through the nuclear receptor ROR $\alpha$ , which may trigger GATA-4 transcription.

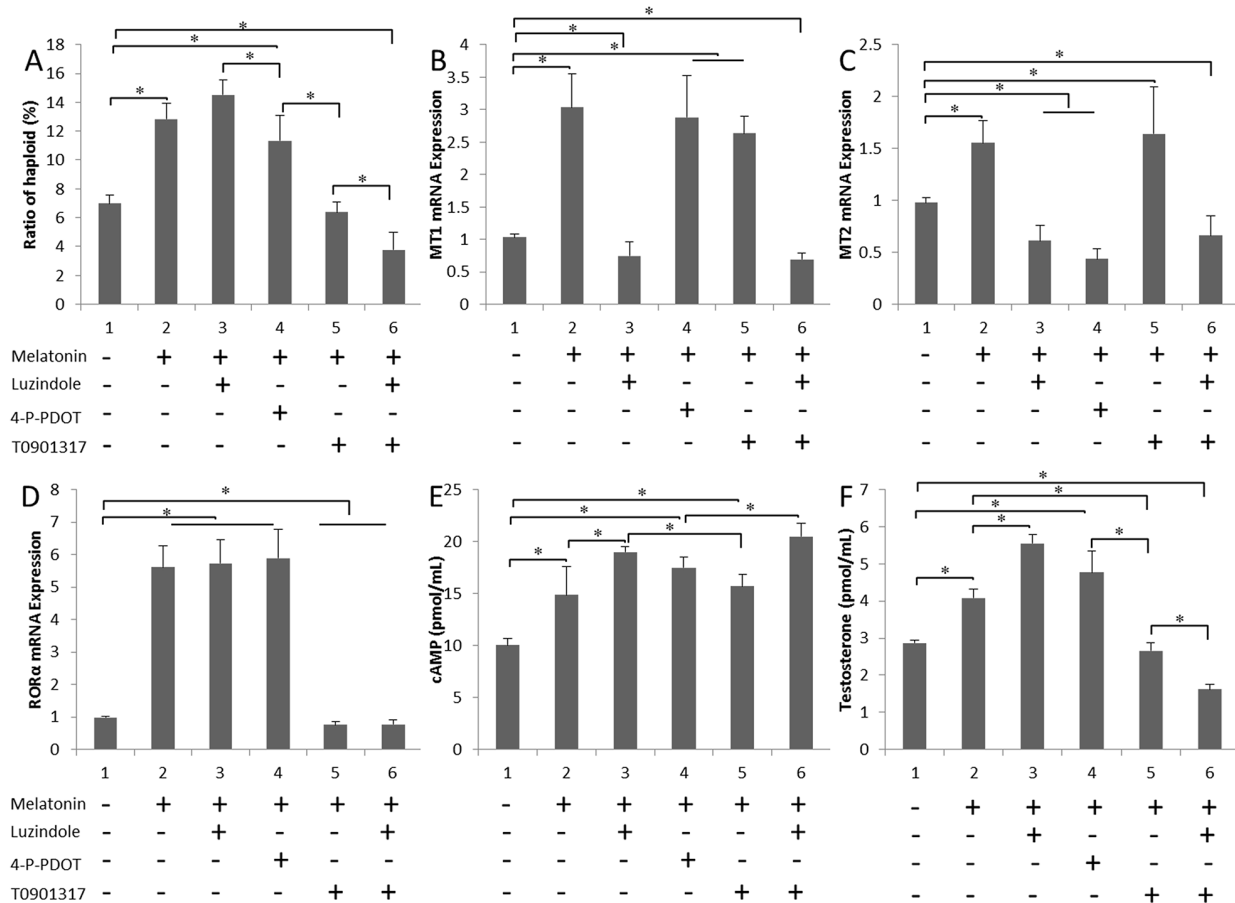

**Figure 3: Effects of the melatonin treatment on testosterone secretion.** (A) Ratios of *in vitro* differentiated haploid cells obtained following treatment with luzindole, 4-P-PDOT and T0901317 are shown. (B-D) MT1, MT2 and ROR $\alpha$  expression in cells cultured with various melatonin receptor antagonists. (E) and (F) cAMP and testosterone concentrations in cells cultured with various melatonin receptor antagonists. Data are expressed as means  $\pm$  SEM; \*  $P < 0.05$ .

## DISCUSSION

Melatonin is known to promote stem cell proliferation and differentiation [39-41]. In addition, melatonin is involved in the function of the male reproductive system, particularly the testes, since Leydig cells are sensitive to melatonin [42, 43]. The simultaneous

administration of melatonin with the transplantation of spermatogonial stem cells in azoospermia mouse testes increases the efficiency of transplantation and improves the structural properties of the testis tissue [44]. Here, melatonin membrane receptors and nuclear receptors were detected in goat testes. Moreover, the expression of ROR $\alpha$  increased with ageing. In the present study, a mixed

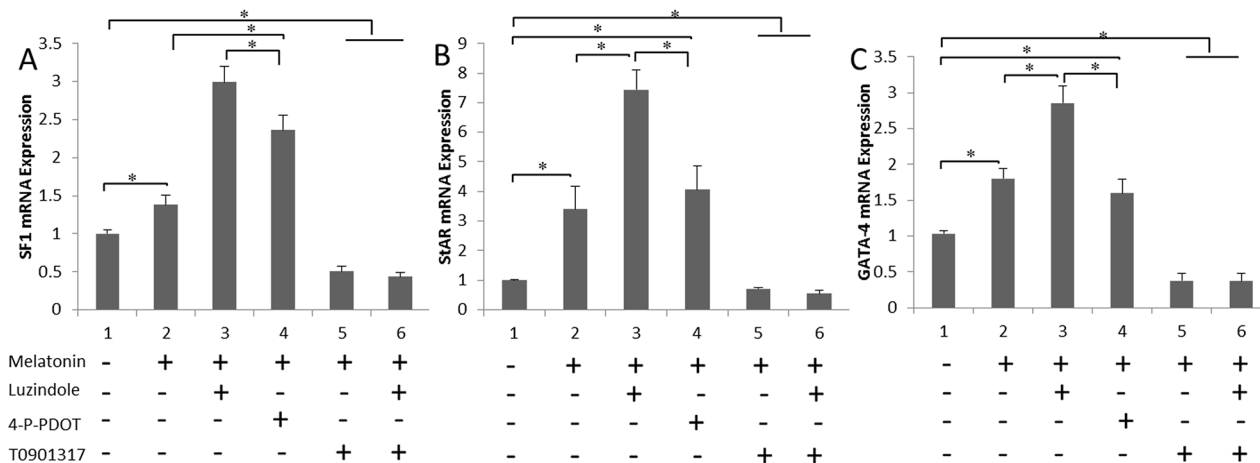

**Figure 4: Melatonin up-regulates the expression of steroidogenesis-related genes via ROR $\alpha$ .** (A and B) The mRNA levels of the steroidogenesis-related genes SF1 and STAR in cells treated with luzindole, 4-P-PDOT and T0901317 are shown. (C) GATA-4 expression patterns in cultured cells treated with the indicated melatonin receptor antagonists are shown. Data are expressed as means  $\pm$  SEM; \*  $P < 0.05$ .

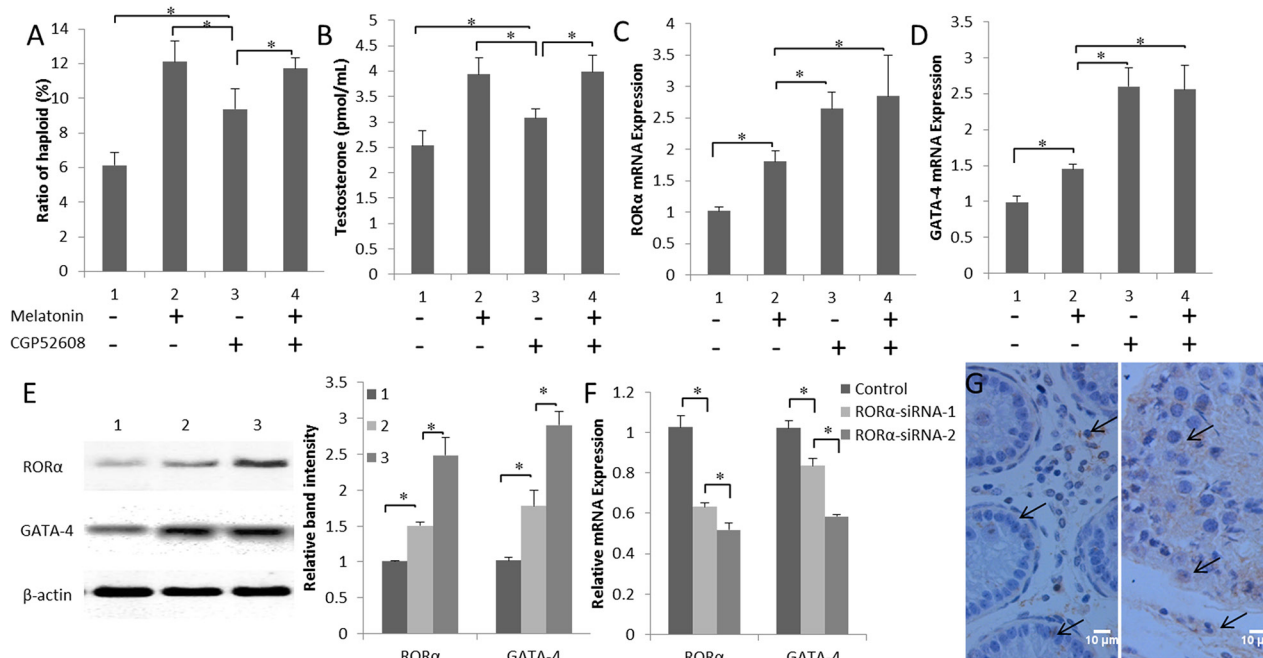

**Figure 5: Melatonin promotes GATA-4 expression via the nuclear receptor ROR $\alpha$ .** (A) Ratios of *in vitro* differentiated haploid cells in melatonin- and CGP52608-treated cells. (B) Testosterone concentrations in cells cultured with CGP52608. (C) and (D) Expression of the ROR $\alpha$  and GATA-4 mRNAs in cells cultured with CGP52608. Data are expressed as means  $\pm$  SEM; \*  $P < 0.05$ . (E) Expression of the ROR $\alpha$  and GATA-4 proteins in cultured cells was detected by western blotting. 1, control; 2, melatonin-treated group; 3, CGP52608-treated group. Data are expressed as means  $\pm$  SEM; \*  $P < 0.05$ . (F) The expression of the ROR $\alpha$  and GATA-4 mRNAs was detected in cells transfected with the ROR $\alpha$  siRNA. Data are expressed as means  $\pm$  SEM; \*  $P < 0.05$ . (G) GATA-4 expression was observed in 3-month-old (left) and 10-month-old (right) goat testes using immunohistochemistry.

culture of dissociated testicular somatic cells with SSCs was used to estimate goat SSC differentiation *in vitro*. After 15 d of co-culture, the differentiation of SSCs into spermatids was detected and sperm cells bearing a single flagellum were observed. The addition of melatonin to this system promoted SSC differentiation into functional haploid sperm-like cells, which was associated with an up-regulation of ROR $\alpha$  expression and an induction of the expression of SSC differentiation-related genes, such as Stra8 and Dmc1, consistent with an earlier report [45]. Testosterone concentrations increase in goats receiving subcutaneous injections of melatonin during the non-reproductive season [46]. As shown in the study Rekik et al, a melatonin treatment increases testosterone levels in rams [47]. Increased levels of androgens during winter may be primarily due to the stimulatory effect of melatonin on the steroidogenic enzyme 3 $\beta$ -hydroxysteroid dehydrogenase [48]. In this study, the addition of exogenous melatonin to the testis cell differentiation-competent culture system also increased testosterone production; furthermore, a ROR $\alpha$ -specific agonist increased steroid production.

Melatonin acts through several specific receptors, including membrane receptors (MT1 and MT2) and members of the RZR/ROR nuclear receptor family (ROR $\alpha$ ) identified in a large variety of mammals [49-51], and exerts a variety of effects that differ between tissues and cells, depending on the receptor [52, 53]. ROR $\alpha$  plays a key role in cell differentiation [54]. ROR $\alpha$  is significantly down-regulated in T cells stably transfected with an inducible MT1 antisense RNA [55]. Melatonin exhibits potent anti-breast cancer activity mediated via the MT1 receptor. Melatonin also represses the transcriptional activity of some mitogenic nuclear receptors, including ROR $\alpha$ , through the MT1 pathway while potentiating the

activity of other receptors (RAR $\alpha$  and RXR $\alpha$ ) involved in differentiation, apoptosis, and inhibiting proliferation [56]. ROR $\alpha$  was expressed at much higher levels in the melatonin+luzindole-treated group and was inhibited by MT1/MT2. Melatonin affected both the transcription of ROR $\alpha$  and its regulated genes [57, 58]. According to the study by Roth et al, the interaction between melatonin and a nuclear receptor may be responsible for the suppression of PC12 cell growth, because these cells do not express functionally active melatonin receptors on the cell surface [59]. Moreover, melatonin depresses the differentiation of mesenchymal stem cells into fat cells without acting through a membrane receptor [60]. However, melatonin may be transferred into cells after interacting with its nuclear receptor, because it is a lipid soluble hormone [61]. Luzindole blocks the binding of melatonin to MT1/MT2. Melatonin treatment desensitizes MT1 receptors, whereas luzindole increases ligand binding and G-protein activation. Luzindole also stimulates downregulation of the MT1 receptor protein, interfering with the synthesis and/or degradation of the receptor [62]. In the present study, the control group contained endogenous melatonin which may play a role during *in vitro* culture without the addition of melatonin, lead to the expression of MT1/MT2 is higher than that of luzindole treatment group. Melatonin regulated the expression of the steroid hormone-related gene StAR through a nuclear receptor, suggesting that melatonin penetrated the testes and regulated steroidogenesis via various signaling pathways.

The classic function of melatonin is to decrease the cAMP concentration through G-proteins and subsequently down-regulate CREB [63]. Acute melatonin treatment of INS-1 cells inhibits cAMP-mediated signal transduction. However, prolonged exposure of INS-1 cells to melatonin sensitizes cAMP-mediated responses to forskolin [64].

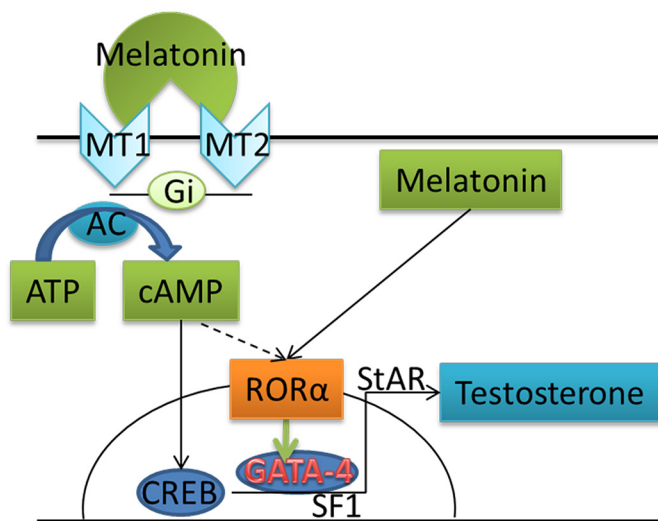

**Figure 6: Schematic illustrating the proposed mechanism by which melatonin increases testosterone production in goat testis cells by binding to ROR $\alpha$ .**



**Table 2: The primer sequences**

| Gene (Accession NO.)         | Primer sequence                                               | Product size (bp) |
|------------------------------|---------------------------------------------------------------|-------------------|
| MT1(AB716764.1)              | 5' GCGTCATCGGGTCTGTTTTTC 3'<br>5' AGGGTCCCCACACACAGGT 3'      | 175               |
| MT2(JF266705.1)              | 5' GCGTCTACTCGTGCCCTT 3'<br>5' TGCTCTCCGCCTTGACCTT 3'         | 159               |
| ROR $\alpha$ (NM001285652.1) | 5' CTTCACGATGACCTCAGCAACTA 3'<br>5' TAGGGGAAGAAGCCTGATGC 3'   | 182               |
| Stra8(JQ836663.1)            | 5' CCTTGAGCGGACACAGAA 3'<br>5' CTTTTGTCCAGGAACTTGCC 3'        | 175               |
| Dmc1(KR935229.1)             | 5' GGTGGCTACTCAGGAGGAAAGA 3'<br>5' GGAACCTCGCTGCTACATAATCA 3' | 187               |
| SF1(XM013967971.1)           | 5' TACCTCTACCCTGCCTTCCCT 3'<br>5' CCGCACTTGGTCCTCATCA 3'      | 177               |
| StAR(XM013975437.1)          | 5' GCAGAAGGGTGTGCATCAGAGC 3'<br>5' GGCAAATCCACTTGGGTCT 3'     | 172               |
| GATA-4(XM013965849.1)        | 5' ACCAGAAAACGGAAGCCCA 3'<br>5' GGGCTCTGTTTTGATGGGAC 3'       | 156               |
| Tnp1(XM005676523.2)          | 5' TGAGGAGGGGCAAGAACAGA 3'<br>5' TCACAAGTGGGAGCGGAAAT 3'      | 134               |
| Prm1(HM773246.1)             | 5' AAGATGTGCGCAGACGAAGGAG 3'<br>5' GGTCTTGCTACTGTGCGGTTA 3'   | 112               |
| $\beta$ -actin(AF481159.1)   | 5' CACGGTGCCCATCTACGAG 3'<br>5' CCTTGATGTCACGGACGATTT 3'      | 158               |

Mimicking the short photoperiod, melatonin signaling (16 h exposure) in primary cultures of melatonin target cells obtained from the ovine pars tuberalis increases the cAMP response to forskolin stimulation compared to that in untreated cells, a phenomenon termed sensitization [65]. In our study, cAMP levels were increased during long-term melatonin treatment. When the melatonin receptor was blocked, the cAMP concentration increased, possibly due to melatonin receptor sensitivity and antioxidant activity. The expression levels of RZR/RORs are regulated by cAMP [66]. ROR $\alpha$  activates CYP8B1 promoter reporter activity in cAMP-stimulated human and mouse cells [67]. The cAMP response unit also contains a putative response element for ROR $\alpha$  [68]. In our studies, cAMP and ROR $\alpha$  were up-regulated in melatonin+luzindole group, and we further characterized the effect of the ROR $\alpha$  response on cAMP-induced transcription.

CREB phosphorylation and its binding to cAMP response elements are two crucial steps in the cAMP pathway. The binding of phosphorylated CREB to the cAMP response element of the StAR promoter accelerates

steroid synthesis. However, in steroidogenic cells, not all cAMP-regulated genes, such as StAR, have a consensus cAMP response element (CRE), but many of them have a regulatory sequence recognized by a GATA family transcription factor [69]. StAR transcription is activated by two transcription factors, SF1 and GATA-4 [70]. In the testes, GATA-4 predominantly regulates StAR transcription [71]. GATA-4 is required for the expression of some steroidogenic genes, including SF1 and StAR [72]. Increased levels of melatonin are known to suppress testis function [73]. Some studies have shown that the inhibitory effects of melatonin on testosterone production are mediated by the down-regulation of GATA-4 and SF1 expression in a mouse MA-10 Leydig cell line [74]. But melatonin improves testis function in short-day seasonal breeders [75]. The expression level of the melatonin receptor in the goat thymus increases considerably in winter [76]. In addition, melatonin increases both the blood testosterone concentration and acrosin activity in ram spermatozoa [77]. Based on the results of the present study, melatonin promoted testosterone production



and ROR $\alpha$ -enhanced GATA-4 and SF1 expression. This result is further supported by the high degree of homology between ROR $\alpha$  and RXR (retinoid X receptor) [78]. Retinoid-responsive StAR transcription is largely regulated by an RXR/RAR heterodimeric motif in the mouse StAR promoter [79]. Moreover, retinoid receptors are capable of increasing the expression of the StAR protein [80], and RXR $\alpha$  interacts directly with GATA-4 [81]. In the present study, both ROR $\alpha$  and GATA-4 were expressed in the goat testis in an age-dependent manner.

In summary, we confirmed that both melatonin membrane receptors and the nuclear receptor are expressed in the goat testes. When spermatogenic cells in the *in vitro* culture system are treated with melatonin, the expression of GATA-4 and its downstream genes was up-regulated and testosterone synthesis was promoted, likely enhancing the efficiency of producing haploid cells from SSCs. Through ROR $\alpha$ , melatonin promotes GATA-4 expression to stimulate testosterone synthesis by Leydig cells, which in turn supports more efficient meiosis and spermatid differentiation via spermiogenesis. Meanwhile, cAMP promotes ROR $\alpha$  expression (Figure 6).

## MATERIALS AND METHODS

### Chemicals and reagents

All chemicals used in this study were purchased from Sigma-Aldrich Chemical Company (St. Louis, MO, USA) unless stated otherwise.

### Ethics statement

Goat surgical biopsies were performed at the experimental station of the China Agricultural University, and the whole procedure was conducted in accordance with the protocol approved by the Animal Welfare Committee of China Agricultural University (Protocol Number XK662).

### Isolation of male goat testicular cells

Testis tissues were obtained from three 3-month-old Saanen goats. Some of the tissues were fixed with 4% paraformaldehyde, embedded in paraffin wax, sectioned, and stained with hematoxylin and eosin (H&E) for the histological analysis. Other testis tissues were transported to the laboratory in normal saline and washed thrice with phosphate-buffered saline (PBS) supplemented with 100 IU/mL penicillin and 100 mg/mL streptomycin. After decapsulation, the dissociated cells and the short seminiferous tubule fragments were dissociated using a modified enzymatic digestion procedure [82]. Briefly, the fragments were incubated with a 10-fold dilution of an

(w/v) enzyme cocktail containing 1 mg/mL collagenase type IV, 1 mg/mL hyaluronidase, and 5  $\mu$ g/mL DNase I at 37 °C for 15 min, followed by neutralization with Dulbecco's Modified Eagle's Medium (DMEM) containing 10% fetal bovine serum (FBS) (Gibco, Grand Island, NY, USA). The cell suspension was filtered using a 40 mesh sieve. The dispersed cells were washed twice with DMEM and pelleted by centrifugation at 500 g.

### *In vitro* differentiation of SSCs

Autologous suspensions of somatic testicular cells (containing spermatogonial stem cells, Sertoli cells, peritubular myoid cells and Leydig cells) were prepared using a method reported by Zhang et al [83], with minor modifications. Briefly, cells were seeded in 60 mm culture dishes and incubated at 37.8 °C for 3 d. The temperature was then maintained at 34 °C in a humidified atmosphere of 5% CO<sub>2</sub>/air (v/v). Cells were suspended in DMEM supplemented with 5% FBS, 1% non-essential amino acids, 10 ng/mL stem cell factor, 10 ng/mL fibroblast growth factor, 25 ng/mL epidermal growth factor, 10 ng/mL insulin-like growth factor, 20 ng/mL glial-derived neurotrophic factor, 10  $\mu$ g/mL transferrin, 10<sup>-4</sup> M vitamin C (Vc), 4 mM L-glutamine, 0.05 IU/mL FSH, 0.05 IU/mL LH and 1% penicillin–streptomycin [84]. Then, 10<sup>-7</sup> M melatonin was added to the cultures. In a subset of cultures, melatonin (10<sup>-7</sup> M) was added with either luzindole (10<sup>-7</sup> M) (a non-selective MT1/MT2 inhibitor), 10<sup>-7</sup> M 4-P-PDOT (a MT2-specific inhibitor), 10<sup>-6</sup> M T0901317 (a ROR $\alpha$  antagonist) or 10<sup>-7</sup> M CGP52608 (a ROR $\alpha$ -specific agonist) [85]. The other tested activators and/or inhibitors were added to the culture medium. In the culture system, half of the media were changed every 2 d. The rate of cell growth was monitored. Cells were cultured for 15 d and transfected with a ROR $\alpha$ -siRNA (target sequence: 1 GAGCCTTATGTGGACGGCA and 2 AGCGATGAAAGCTCAAATTGAAA) and GATA4-siRNA (target sequence: AACCTTAACAAATCA AAGACACC) using the INTERFERin siRNA transfection reagent (Polyplus-transfection, Illkirch, France) according to the manufacturer's instructions.

### Flow cytometric analyses

The DNA content of the cells was examined by flow cytometry. The *in vitro* cell suspensions were adjusted to 1 $\times$ 10<sup>6</sup> cells/mL and collected at 15 d; sperm from a mature goat served as a control. The cells and sperm were fixed with 70% ethanol for 4 h. After three washes with PBS, the cells were incubated with PBS containing 200  $\mu$ g/mL RNase I and 20  $\mu$ g/mL propidium iodide (PI) at 37 °C for 10 min. Finally, the DNA content of the cells was determined by flow cytometry.

## Quantitative real-time PCR and reverse transcription PCR

The testis tissues and testicular cells were collected to determine the expression levels of specific genes, including melatonin receptors (MT1, MT2 and ROR $\alpha$ ), genes expressed in post-meiotic spermatids and sperm (transition protein 1 (Tnp1) and protamine 1 (Prm1)), rate-limiting enzymes in testosterone synthesis (steroidogenic acute regulatory protein (StAR) and splicing factor 1 (SF1)) and GATA-4. Genes related to SSC differentiation, stimulated by retinoic acid gene 8 (Stra8) and DNA meiotic recombinase 1 (Dmc1), were detected by reverse transcription PCR, and  $\beta$ -actin was used as an internal control. The primer sequences are listed in Table 2. Total RNA was extracted using TRIzol reagent (Invitrogen, Carlsbad, CA, USA) according to the manufacturer's protocol. Reverse transcription PCR was performed using a cDNA synthesis kit (Promega, Madison, WI, USA), and 2  $\mu$ L of total RNA were used according to the manufacturer's protocol. Real-time PCR reactions were performed using a Real Master Mix SYBR Green Kit (Tiangen, Corp., Beijing, China) on a Stratagene Mx300p (Agilent Technologies Inc., Santa Clara, CA, USA). Fold changes in gene expression were calculated using the  $2^{-\Delta\Delta Ct}$  method as a ratio of the expression levels of the treated groups to the expression level of the control group.

## Enzyme-linked immunosorbent assay

The cultured cells and spent media were collected. Enzyme-linked immunosorbent assay (ELISA) kits were used to detect the Stra8, Dmc1, Prm1, Tnp1, MT1, MT2, ROR $\alpha$ , testosterone and cAMP levels (Hermes Criterion Biotechnology, Vancouver, Canada) according to the manufacturer's instructions.

## Immunofluorescence analysis

The cells in the culture system were processed for immunofluorescence staining for acrosin (Bioss, Beijing China, bs-5151R), a marker of differentiated spermatozoa, after 15 d. Briefly, the cells were fixed with 70% alcohol for 2 h and then washed twice with PBS. Slides were blocked with 1% BSA for 1 h at room temperature, and the antibody (final concentration 1:200) was added to the solution and incubated for 4 h. Slides were rinsed twice and washed three times with PBS for 5 min. The secondary antibody (1:500) was incubated with the cells for 1 h at room temperature, followed by washes with PBS. The nuclei were stained with DAPI.

## Immunohistochemistry

Testis samples from 3-month-old goats were fixed with 4% paraformaldehyde. The samples were cryo-embedded in optimum cutting temperature (OCT)

compound and then cut into 7  $\mu$ m thick sections. MT1 (Santa Cruz Biotechnology sc-13180), MT2 (Santa Cruz Biotechnology sc-13177), ROR $\alpha$  (Abcam ab60134) and GATA-4 (Santa Cruz Biotechnology sc-1237) distributions were examined using immunohistochemistry. Briefly, after washing three times with PBS, the slides were incubated with PBS containing 1% bovine serum albumin (BSA) for 1 h at room temperature. Primary antibodies directed against MT1 (final concentration 1:200), MT2 (final concentration 1:200), GATA-4 (final concentration 1:200), and ROR $\alpha$  (final concentration 1:200) were added to the solution. After 4 hours of incubation, the secondary antibody was applied for 1 h. Staining was visualized using a 3,3'-diaminobenzidine (DAB) substrate kit.

## Western blot analysis

Total protein was isolated from both cultured cells and goat testes. MT1, MT2, ROR $\alpha$ , and GATA-4 were examined by western blotting, and  $\beta$ -actin served as a control. The proteins were electrophoretically separated on 12% SDS-PAGE gels under reducing conditions and transferred to nitrocellulose membranes. The blots were blocked in 5% BSA and incubated with the primary antibody overnight at 4  $^{\circ}$ C, followed by incubation with the secondary antibody for 1 h at room temperature. Protein bands were visualized using enhanced chemiluminescence detection reagents (Applygen Technologies Inc., Beijing, China). Optical densities were quantified by scanning densitometry and expressed in arbitrary units determined by ImageJ software (NIH, USA).

## Intracytoplasmic microinjections

Ovaries were obtained from a slaughterhouse. Cumulus cells and cumulus-oocyte complexes (COCs) were selected and cultured in the *in vitro* maturation (IVM) medium (10% FBS TCM-199 (Gibco), 0.05 IU/mL FSH, 0.05 IU/mL LH, 1  $\mu$ g/mL 17 $\beta$ -estradiol, 10 ng/mL epidermal growth factor, and 2 mM glutamine). Oocytes extruding the first polar body were selected for haploid cell injection. Spermatids with single flagella used for microinjections were less than 10  $\mu$ m in diameter. Micromanipulation was performed in TCM-199 supplemented with 5  $\mu$ g/mL cytochalasin B, 3 mg/mL BSA, and 0.5 mM HEPES. Oocytes were activated with 5  $\mu$ M ionomycin for 5 min prior to the injection. The cell membranes of spermatids with a single flagellum were destroyed by repeated blowing with an injection needle, and then injected into the cytoplasm of oocytes. The intracytoplasmic injection was completed within 1 hour after activation. Recovered couplets were transferred into development medium (*in vitro* culture, the medium included modified synthetic oviduct fluid supplemented with amino acids, 0.2 mM glutamine, 6 mg/mL BSA, 3% essential amino acids, 1% non-essential amino acids and 0.5 mg/mL inositol) for recovery at 38

°C in a 5% CO<sub>2</sub>/95% air (v/v) atmosphere for 30 min, and subsequently activated with 5 μM ionomycin for 5 min and 2 mM 6-dimethylaminopyridine for 4 h. After activation, reconstructed embryos were cultured at 38 °C in a 5% CO<sub>2</sub> atmosphere to allow development, and blastocysts were observed on day 7.

## Statistical analyses

All experiments were repeated at least 3 times, the sample size (n = 3) in each experiment. One-way ANOVA followed by Duncan's test was used to determine the statistical significance of the differences between the selected groups. Statistical analyses were conducted using Statistical Analysis System software (SAS Institute, Cary, NC, USA). All data are expressed as means ± standard errors of the means (SEM). Differences were considered significant when  $P < 0.05$ .

## Author contributions

Conceived and designed the experiments: Shou-Long Deng, Zheng-Xing Lian, and Yi-Xun Liu. Performed the experiments: Shou-Long Deng, De-Ping Han, Su-Ren Chen and Xiu-Xia Wang. Analyzed the data: Shou-Long Deng and Yi-Xun Liu. Contributed reagents/materials/analysis tools: Yan Zhang and Xiu-Xia Wang. Wrote the paper: Shou-Long Deng, Kun Yu, C. Yan Cheng and Yi-Xun Liu.

## CONFLICTS OF INTEREST

The authors declare that they have no competing interest.

## FUNDING

This work was supported by grants from Major Research Plan "973" Project (2012CB944702), LNCCC-D50-2015, LNCCC-C09-2015, Natural Science Foundation of China (31501953, 31501161, 31471352, 31471400, 81270662 and 31171380), National Transgenic Creature Breeding Grand Project (2013ZX08008-005), National Technology Support Project (2012DAI131B08) and Academician Workstation Support (Changsha Reproductive Medicine Hospital, Bin-Zhou Medical College).

## REFERENCES

1. Deng SL, Chen SR, Wang ZP, Zhang Y, Tang JX, Li J, Wang XX, Cheng JM, Jin C, Li XY, Zhang BL, Yu K, Lian ZX, et al. Melatonin promotes development of haploid germ cells from early developing spermatogenic cells of Suffolk sheep under *in vitro* condition. *J Pineal Res.* 2016; 60:435–447.
2. Chen SR, Liu YX. Myh11-Cre is not limited to peritubular myoid cells and interaction between Sertoli and peritubular myoid cells needs investigation. *Proc Natl Acad Sci U S A.* 2016; 113:E2352.
3. Chen LY, Brown PR, Willis WB, Eddy EM. Peritubular myoid cells participate in male mouse spermatogonial stem cell maintenance. *Endocrinology.* 2014; 155:4964–4974.
4. Chen LY, Willis WD, Eddy EM. Targeting the Gdnf gene in peritubular myoid cells disrupts undifferentiated spermatogonial cell development. *Proc Natl Acad Sci U S A.* 2016; 113:1829–1834.
5. Chen SR, Tang JX, Cheng JM, Li J, Jin C, Li XY, Deng SL, Zhang Y, Wang XX, Liu YX. Loss of Gata4 in Sertoli cells impairs the spermatogonial stem cell niche and causes germ cell exhaustion by attenuating chemokine signaling. *Oncotarget.* 2015; 6:37012–37027. <https://doi.org/10.18632/oncotarget.6115>.
6. Chen SR, Hao XX, Zhang Y, Deng SL, Wang ZP, Wang YQ, Wang XX, Liu YX. Androgen receptor in Sertoli cells regulates DNA double-strand break repair and chromosomal synapsis of spermatocytes partially through intercellular EGF-EGFR signaling. *Oncotarget.* 2016; 7:18722–18735. <https://doi.org/10.18632/oncotarget.7916>.
7. Chen SR, Liu YX. Regulation of spermatogonial stem cell self-renewal and spermatocyte meiosis by Sertoli cell signaling. *Reproduction.* 2015; 149:R159–167.
8. Cremades N, Sousa M, Bernabeu R, Barros A. Developmental potential of elongating and elongated spermatids obtained after *in-vitro* maturation of isolated round spermatids. *Hum Reprod.* 2001; 16:1938–1944.
9. Stukenborg JB, Wistuba J, Luetjens CM, Elhija MA, Huleihel M, Lunenfeld E, Gromoll J, Nieschlag E, Schlatt S. Coculture of spermatogonia with somatic cells in a novel three-dimensional soft-agar-culture-system. *J Androl.* 2008; 29:312–329.
10. Hasegawa H, Terada Y, Ugajin T, Yaegashi N, Sato K. A novel culture system for mouse spermatid maturation which produces elongating spermatids capable of inducing calcium oscillation during fertilization and embryonic development. *J Assist Reprod Genet.* 2010; 27:565–570.
11. Sato T, Katagiri K, Yokonishi T, Kubota Y, Inoue K, Ogonuki N, Matoba S, Ogura A, Ogawa T. *In vitro* production of fertile sperm from murine spermatogonial stem cell lines. *Nat Commun.* 2011; 2:472.
12. Hadley MA, Byers SW, Suárez-Quian CA, Kleinman HK, Dym M. Extracellular matrix regulates Sertoli cell differentiation, testicular cord formation, and germ cell development *in vitro*. *J Cell Biol.* 1985; 101:1511–1522.
13. Xie B, Qin Z, Huang B, Xie T, Yao H, Wei Y, Yang X, Shi D, Jiang H. *In vitro* culture and differentiation of buffalo (*Bubalus bubalis*) spermatogonia. *Reprod Domest Anim.* 2010; 45:275–282.
14. Tres LL, Kierszenbaum AL. Viability of rat spermatogenic cells *in vitro* is facilitated by their coculture with Sertoli



- cells in serum-free hormone-supplemented medium. *Proc Natl Acad Sci U S A.* 1983; 80:3377–3381.
15. Stocco DM, Wang X, Jo Y, Manna PR. Multiple signaling pathways regulating steroidogenesis and steroidogenic acute regulatory protein expression: more complicated than we thought. *Mol Endocrinol.* 2005; 19:2647–2659.
  16. Walker WH. Testosterone signaling and the regulation of spermatogenesis. *Spermatogenesis.* 2011; 1:116–120.
  17. Wen Q, Cheng CY, Liu YX. Development, function and fate of fetal Leydig cells. *Semin Cell Dev Biol.* 2016; 59:89–98.
  18. Hu MC, Hsu NC, Pai CI, Wang CK, Chung Bc. Functions of the upstream and proximal steroidogenic factor 1 (SF-1)-binding sites in the CYP11A1 promoter in basal transcription and hormonal response. *Mol Endocrinol.* 2001; 15:812–818.
  19. Viguie C, Caraty A, Locatelli A, Malpoux B. Regulation of luteinizing hormone-releasing hormone (LHRH) secretion by melatonin in the ewe. I. Simultaneous delayed increase in LHRH and luteinizing hormone pulsatile secretion. *Biol Reprod.* 1995; 52:1114–1120.
  20. Tsantarliotou MP, Kokolis NA, Smokovitis A. Melatonin administration increased plasminogen activator activity in ram spermatozoa. *Theriogenology.* 2008; 69:458–465.
  21. Reiter RJ, Tan DX, Rosales-Corral S, Manchester LC. The universal nature, unequal distribution and antioxidant function of melatonin and its derivatives. *Mini-Rev Med Chem.* 2013; 13:373–384.
  22. Ji YL, Wang H, Meng C, Zhao XF, Zhang C, Zhang Y, Zhao M, Chen YH, Meng XH, Xu DX. Melatonin alleviates cadmium-induced cellular stress and germ cell apoptosis in testes. *J Pineal Res.* 2012; 52:71–79.
  23. Lanoix D, Beghdadi H, Lafond J, Vaillancourt C. Human placental trophoblasts synthesize melatonin and express its receptors. *J Pineal Res.* 2008; 45:50–60.
  24. Winczyk K, Pawlikowski M, Karasek M. Melatonin and RZR/ROR receptor ligand CGP 52608 induce apoptosis in the murine colon cancer. *J Pineal Res.* 2001; 31:179–182.
  25. Jetten AM. Retinoid-related orphan receptors (RORs): critical roles in development, immunity, circadian rhythm, and cellular metabolism. *Nucl Recept Signal.* 2009; 7:e003.
  26. Manchester LC, Coto-Montes A, Boga JA, Andersen LP, Zhou Z, Galano A, Vriend J, Tan DX, Reiter RJ. Melatonin: an ancient molecule that makes oxygen metabolically tolerable. *J Pineal Res.* 2015; 59:403–419.
  27. Brydon L, Roka F, Petit L, de Coppet P, Tissot M, Barrett P, Morgan PJ, Nanoff C, Strosberg AD, Jockers R. Dual signaling of human melatonin receptors via G(i2), G(i3), and G(q11) proteins. *Mol Endocrinol.* 1999; 13:2025–2038.
  28. Wang SJ, Liu WJ, Wu CJ, Ma FH, Ahmad S, Liu BR, Han L, Jiang XP, Zhang SJ, Yang LG. Melatonin suppresses apoptosis and stimulates progesterone production by bovine granulosa cells via its receptors (MT1 and MT2). *Theriogenology.* 2012; 78:1517–1526.
  29. Steinmayr M, André E, Conquet F, Rondi-Reig L, Delhaye-Bouchaud N, Auclair N, Daniel H, Crépel F, Mariani J, Sotelo C, Becker-André M. Staggerer phenotype in retinoid-related orphan receptor alpha-deficient mice. *Proc Natl Acad Sci U S A.* 1998; 95:3960–3965.
  30. Karasek M, Gruszka A, Lawnicka H, Kunert-Radek J, Pawlikowski M. Melatonin inhibits growth of diethylstilbestrol-induced prolactin-secreting pituitary tumor *in vitro*: possible involvement of nuclear RZR/ROR receptors. *J Pineal Res.* 2003; 34:294–296.
  31. He B, Zhao Y, Xu L, Gao L, Su Y, Lin N, Pu J. The nuclear melatonin receptor ROR $\alpha$  is a novel endogenous defender against myocardial ischemia/reperfusion injury. *J Pineal Res.* 2016; 60:313–326.
  32. Odawara H, Iwasaki T, Horiguchi J, Rokutanda N, Hirooka K, Miyazaki W, Koibuchi Y, Shimokawa N, Iino Y, Takeyoshi I, Koibuchi N. Activation of aromatase expression by retinoic acid receptor-related orphan receptor (ROR) alpha in breast cancer cells: identification of a novel ROR response element. *J Biol Chem.* 2009; 284:17711–17719.
  33. Reiter RJ, Tan DX, Manchester LC, Paredes SD, Mayo JC, Sainz RM. Melatonin and reproduction revisited. *Biol Reprod.* 2009; 81:445–456.
  34. Casao A, Gallego M, Abecia JA, Forcada F, Pérez-Pé R, Muñio-Blanco T, Cebrián-Pérez JÁ. Identification and immunolocalisation of melatonin MT(1) and MT(2) receptors in rasa aragonesa ram spermatozoa. *Reprod Fertil Dev.* 2012; 24:953–961.
  35. Valenti S, Guido R, Giusti M, Giordano G. *In vitro* acute and prolonged effects of melatonin on purified rat Leydig cell steroidogenesis and adenosine 3',5'-monophosphate production. *Endocrinology.* 1995; 136:5357–5362.
  36. Kasahara T, Abe K, Mekada K, Yoshiki A, Kato T. Genetic variation of melatonin productivity in laboratory mice under domestication. *Proc Natl Acad Sci U S A.* 2010; 107:6412–6417.
  37. Xin Z, Jiang S, Jiang P, Yan X, Fan C, Di S, Wu G, Yang Y, Reiter RJ, Ji G. Melatonin as a treatment for gastrointestinal cancer: a review. *J Pineal Res.* 2015; 58:375–387.
  38. Sá R, Neves R, Fernandes S, Alves C, Carvalho F, Silva J, Cremades N, Malheiro I, Barros A, Sousa M. Cytological and expression studies and quantitative analysis of the temporal and stage-specific effects of follicle-stimulating hormone and testosterone during cocultures of the normal human seminiferous epithelium. *Biol Reprod.* 2008; 79:962–975.
  39. Cho YA, Noh K, Jue SS, Lee SY, Kim EC. Melatonin promotes hepatic differentiation of human dental pulp stem cells: clinical implications for the prevention of liver fibrosis. *J Pineal Res.* 2015; 58:127–135.
  40. Fu J, Zhao SD, Liu HJ, Yuan QH, Liu SM, Zhang YM, Ling EA, Hao AJ. Melatonin promotes proliferation and differentiation of neural stem cells subjected to hypoxia *in vitro*. *J Pineal Res.* 2011; 51:104–112.



41. Luchetti F, Canonico B, Bartolini D, Arcangeletti M, Ciffolilli S, Murdolo G, Piroddi M, Papa S, Reiter RJ, Galli F. Melatonin regulates mesenchymal stem cell differentiation: a review. *J Pineal Res.* 2014; 56:382–397.
42. Li C, Zhou X. Melatonin and male reproduction. *Clin Chim Acta.* 2015; 446:175–180.
43. Baburski AZ, Sokanovic SJ, Janjic MM, Stojkov-Mimic NJ, Bjelic MM, Andric SA, Kostic TS. Melatonin replacement restores the circadian behavior in adult rat Leydig cells after pinealectomy. *Mol Cell Endocrinol.* 2015; 413:26–35.
44. Gholami M, Saki G, Hemadi M, Khodadadi A, Mohammadi-Asl J. Melatonin improves spermatogonial stem cells transplantation efficiency in azoospermic mice. *Iran J Basic Med Sci.* 2014; 17:93–99.
45. Childs AJ, Cowan G, Kinnell HL, Anderson RA, Saunders PT. Retinoic acid signalling and the control of meiotic entry in the human fetal gonad. *PLoS One.* 2011; 6:e20249.
46. Rekik M, Taboubi R, Ben Salem I, Fehri Y, Sakly C, Lassoued N, Hilali ME. Melatonin administration enhances the reproductive capacity of young rams under a southern Mediterranean environment. *Anim Sci J.* 2015; 86:666–672.
47. Casao A, Pérez-Pé R, Abecia JA, Forcada F, Muñoz-Blanco T, Cebrián-Pérez JÁ. The effect of exogenous melatonin during the non-reproductive season on the seminal plasma hormonal profile and the antioxidant defence system of Rasa Aragonesa rams. *Anim Reprod Sci.* 2013; 138:168–174.
48. Srivastava RK, Krishna A. Melatonin affects steroidogenesis and delayed ovulation during winter in vesperilionid bat, *Scotophilus heathi*. *J Steroid Biochem Mol Biol.* 2010; 118:107–116.
49. Cui P, Yu M, Luo Z, Dai M, Han J, Xiu R, Yang Z. Intracellular signaling pathways involved in cell growth inhibition of human umbilical vein endothelial cells by melatonin. *J Pineal Res.* 2008; 44:107–114.
50. Tomás-Zapico C, Coto-Montes A. A proposed mechanism to explain the stimulatory effect of melatonin on antioxidative enzymes. *J Pineal Res.* 2005; 39:99–104.
51. Shajari S, Laliena A, Heegsma J, Tuñón MJ, Moshage H, Faber KN. Melatonin suppresses activation of hepatic stellate cells through ROR $\alpha$ -mediated inhibition of 5-lipoxygenase. *J Pineal Res.* 2015; 59:391–401.
52. Jarzynka MJ, Passey DK, Ignatius PF, Melan MA, Radio NM, Jockers R, Rasenick MM, Brydon L, Witt-Enderby PA. Modulation of melatonin receptors and G-protein function by microtubules. *J Pineal Res.* 2006; 41:324–336.
53. Carbajo-Pescador S, García-Palomo A, Martín-Renedo J, Piva M, González-Gallego J, Mauriz JL. Melatonin modulation of intracellular signaling pathways in hepatocarcinoma HepG2 cell line: role of the MT1 receptor. *J Pineal Res.* 2011; 51:463–471.
54. Kojima H, Muromoto R, Takahashi M, Takeuchi S, Takeda Y, Jetten AM, Matsuda T. Inhibitory effects of azole-type fungicides on interleukin-17 gene expression via retinoic acid receptor-related orphan receptors  $\alpha$  and  $\gamma$ . *Toxicol Appl Pharmacol.* 2012; 259:338–345.
55. Lardone PJ, Carrillo-Vico A, Molinero P, Rubio A, Guerrero JM. A novel interplay between membrane and nuclear melatonin receptors in human lymphocytes: significance in IL-2 production. *Cell Mol Life Sci.* 2009; 66:516–525.
56. Hill SM, Cheng C, Yuan L, Mao L, Jockers R, Dauchy B, Blask DE. Age-related decline in melatonin and its MT1 receptor are associated with decreased sensitivity to melatonin and enhanced mammary tumor growth. *Curr Aging Sci.* 2013; 6:125–133.
57. Gupta S, Haldar C, Ahmad R. Photoperiodic regulation of nuclear melatonin receptor ROR $\alpha$  in lymphoid organs of a tropical rodent *Funambulus pennanti*: role in seasonal oxidative stress. *J Photochem Photobiol B.* 2015; 142:141–153.
58. Lardone PJ, Guerrero JM, Fernández-Santos JM, Rubio A, Martín-Lacave I, Carrillo-Vico A. Melatonin synthesized by T lymphocytes as a ligand of the retinoic acid-related orphan receptor. *J Pineal Res.* 2011; 51:454–462.
59. Roth JA, Rabin R, Agnello K. Melatonin suppression of PC12 cell growth and death. *Brain Res.* 1997; 768:63–70.
60. Zhang L, Su P, Xu C, Chen C, Liang A, Du K, Peng Y, Huang D. Melatonin inhibits adipogenesis and enhances osteogenesis of human mesenchymal stem cells by suppressing PPAR $\gamma$  expression and enhancing Runx2 expression. *J Pineal Res.* 2010; 49:364–372.
61. Barrett P, Conway S, Morgan PJ. Digging deep—structure-function relationships in the melatonin receptor family. *J Pineal Res.* 2003; 35:221–230.
62. Kokkola T, Vaitinen M, Laitinen JT. Inverse agonist exposure enhances ligand binding and G protein activation of the human MT1 melatonin receptor, but leads to receptor down-regulation. *J Pineal Res.* 2007; 43:255–262.
63. Girgert R, Hanf V, Emons G, Gründker C. Membrane-bound melatonin receptor MT1 down-regulates estrogen responsive genes in breast cancer cells. *J Pineal Res.* 2009; 47:23–31.
64. Kemp DM, Ubeda M, Habener JF. Identification and functional characterization of melatonin mel 1a receptors in pancreatic beta cells: potential role in incretin-mediated cell function by sensitization of cAMP signaling. *Mol Cell Endocrinol.* 2002; 191:157–166.
65. Barrett P, Choi WS, Morris M, Morgan P. A role for tyrosine phosphorylation in the regulation and sensitization of adenylate cyclase by melatonin. *FASEB J.* 2000; 14:1619–1628.
66. Madsen A, Bjune JI, Bjørkhaug L, Mellgren G, Sagen JV. The cAMP-dependent protein kinase downregulates glucose-6-phosphatase expression through ROR $\alpha$  and SRC-2 coactivator transcriptional activity. *Mol Cell Endocrinol.* 2016; 419:92–101.
67. Pathak P, Li T, Chiang JY. Retinoic acid-related orphan receptor  $\alpha$  regulates diurnal rhythm and fasting induction of

- sterol 12 $\alpha$ -hydroxylase in bile acid synthesis. *J Biol Chem.* 2013; 288:37154–37165.
68. Matsuoka H, Shima A, Kuramoto D, Kikumoto D, Matsui T, Michihara A. Phosphoenolpyruvate carboxykinase, a key enzyme that controls blood glucose, is a target of retinoic acid receptor-related orphan receptor  $\alpha$ . *PLoS One.* 2015; 10:e0137955.
  69. Bouchard MF, Taniguchi H, Viger RS. The effect of human GATA4 gene mutations on the activity of target gonadal promoters. *J Mol Endocrinol.* 2009; 42:149–160.
  70. Martin LJ, Tremblay JJ. The nuclear receptors NUR77 and SF1 play additive roles with c-JUN through distinct elements on the mouse Star promoter. *J Mol Endocrinol.* 2009; 42:119–129.
  71. Svechnikov K, Landreh L, Weisser J, Izzo G, Colón E, Svechnikova I, Söder O. Origin, development and regulation of human Leydig cells. *Horm Res Paediatr.* 2010; 73:93–101.
  72. Viger RS, Guittot SM, Anttonen M, Wilson DB, Heikinheimo M. Role of the GATA family of transcription factors in endocrine development, function, and disease. *Mol Endocrinol.* 2008; 22:781–798.
  73. Cagnacci A, Volpe A. Influence of melatonin and photoperiod on animal and human reproduction. *J Endocrinol Invest.* 1996; 19:382–411.
  74. Qin F, Zhang J, Zan L, Guo W, Wang J, Chen L, Cao Y, Shen O, Tong J. Inhibitory effect of melatonin on testosterone synthesis is mediated via GATA-4/SF-1 transcription factors. *Reprod Biomed Online.* 2015; 31:638–646.
  75. Mura MC, Luridiana S, Bodano S, Daga C, Cosso G, Diaz ML, Bini PP, Carcangiu V. Influence of melatonin receptor 1A gene polymorphisms on seasonal reproduction in sardaewes with different body condition scores and ages. *Anim Reprod Sci.* 2014; 149:173–177.
  76. Ghosh S, Singh AK, Haldar C. Seasonal modulation of immunity by melatonin and gonadal steroids in a short day breeder goat *capra hircus*. *Theriogenology.* 2014; 82:1121–1130.
  77. Kokolis N, Theodosiadou E, Tsantarliotou M, Rekkas C, Goulas P, Smokovitis A. The effect of melatonin implants on blood testosterone and acrosin activity in spermatozoa of the ram. *Andrologia.* 2000; 32:107–114.
  78. Langlois MC, Beaudry G, Zekki H, Rouillard C, Lévesque D. Impact of antipsychotic drug administration on the expression of nuclear receptors in the neocortex and striatum of the rat brain. *Neuroscience.* 2001; 106:117–128.
  79. Manna PR, Slominski AT, King SR, Stetson CL, Stocco DM. Synergistic activation of steroidogenic acute regulatory protein expression and steroid biosynthesis by retinoids: involvement of cAMP/PKA signaling. *Endocrinology.* 2014; 155:576–591.
  80. Manna PR, Stetson CL, Daugherty C, Shimizu I, Syapin PJ, Garrel G, Cohen-Tannoudji J, Huhtaniemi I, Slominski AT, Pruitt K, Stocco DM. Up-regulation of steroid biosynthesis by retinoid signaling: implications for aging. *Mech Ageing Dev.* 2015; 150:74–82.
  81. Clabby ML, Robison TA, Quigley HF, Wilson DB, Kelly DP. Retinoid X receptor alpha represses GATA-4-mediated transcription via a retinoid-dependent interaction with the cardiac-enriched repressor FOG-2. *J Biol Chem.* 2003; 278:5760–5767.
  82. Izadyar F, Spierenberg GT, Creemers LB, den Ouden K, de Rooij DG. Isolation and purification of type a spermatogonia from the bovine testis. *Reproduction.* 2002; 124:85–94.
  83. Zhang Y, Wang S, Wang X, Liao S, Wu Y, Han C. Endogenously produced FGF2 is essential for the survival and proliferation of cultured mouse spermatogonial stem cells. *Cell Res.* 2012; 22:773–776.
  84. Vigier M, Weiss M, Perrard MH, Godet M, Durand P. The effects of FSH and of testosterone on the completion of meiosis and the very early steps of spermiogenesis of the rat: an *in vitro* study. *J Mol Endocrinol.* 2004; 33:729–742.
  85. Kumar N, Solt LA, Conkright JJ, Wang Y, Istrate MA, Busby SA, Garcia-Ordóñez RD, Burris TP, Griffin PR. The benzenesulfoamide T0901317 [N-(2,2,2-trifluoroethyl)-N-[4-[2,2,2-trifluoro-1-hydroxy-1-(trifluoromethyl)ethyl]phenyl]-benzenesulfonamide] is a novel retinoic acid receptor-related orphan receptor- $\alpha$ / $\gamma$  inverse agonist. *Mol Pharmacol.* 2010; 77:228–236.
